# Supplementary material for: Effect of Polar Head Group Modifications on the Tumor Retention of Phospholipid Ether Analogs: Role of the Quaternary Nitrogen
Source: MDPI journal article supplement (doi:10.3390/pharmaceutics15010171), 2023-01-03

## Supporting Information

# Effect of Polar Head Group Modifications on the Tumor Retention of Phospholipid Ether Analogs: Role of the Quaternary Nitrogen

Anatoly N. Pinchuk <sup>1,\*</sup>, Mark A. Rampy <sup>2,†</sup>, Marc A. Longino <sup>1</sup>, Ben Y. Durkee <sup>1</sup>, Raymond E. Counsell <sup>2</sup> and Jamey P. Weichert <sup>1</sup>

<sup>1</sup> Department of Radiology, University of Wisconsin School of Medicine and Public Health, 1111 Highland Ave., WIMR, Madison, WI 53705, USA

<sup>2</sup> Department of Pharmacology, The University of Michigan Medical School, 1150 W. Medical Center Drive, Ann Arbor, MI 48109, USA

\* Correspondence: apinchuk@uwhealth.org

† Current address: Sequella Inc., 9610 Medical Center Drive, Suite 200, Rockville, MD 20850, USA.

### Table of Contents:

|                                                                                           |         |
|-------------------------------------------------------------------------------------------|---------|
| <sup>1</sup> H-NMR spectra of compounds <b>6</b> , <b>2</b> , <b>3</b> and <b>4</b> ..... | S2 – S5 |
|-------------------------------------------------------------------------------------------|---------|

S2

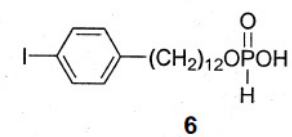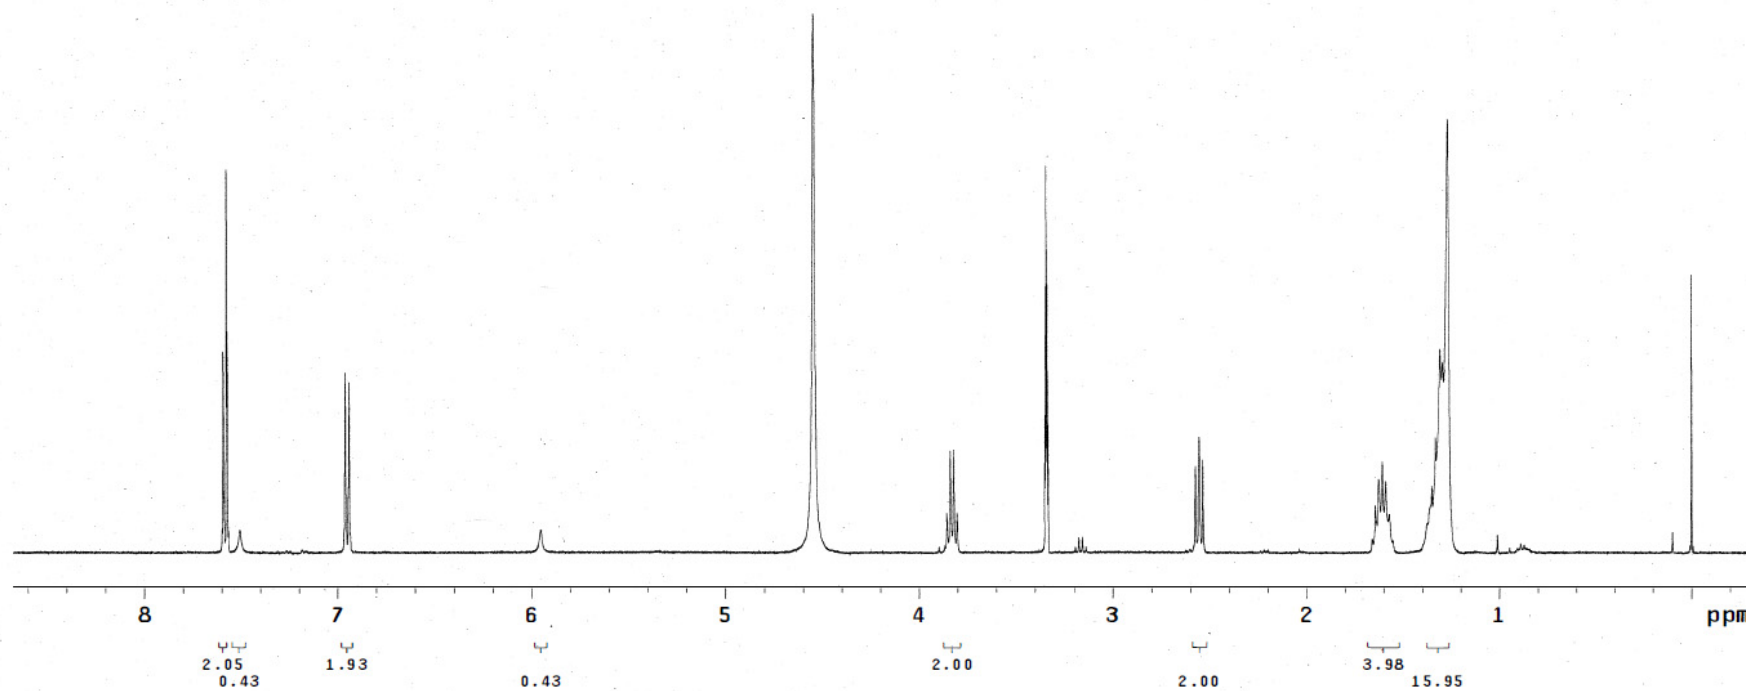

S3

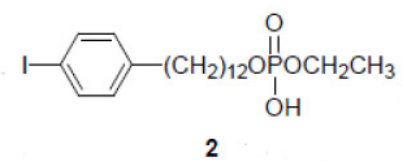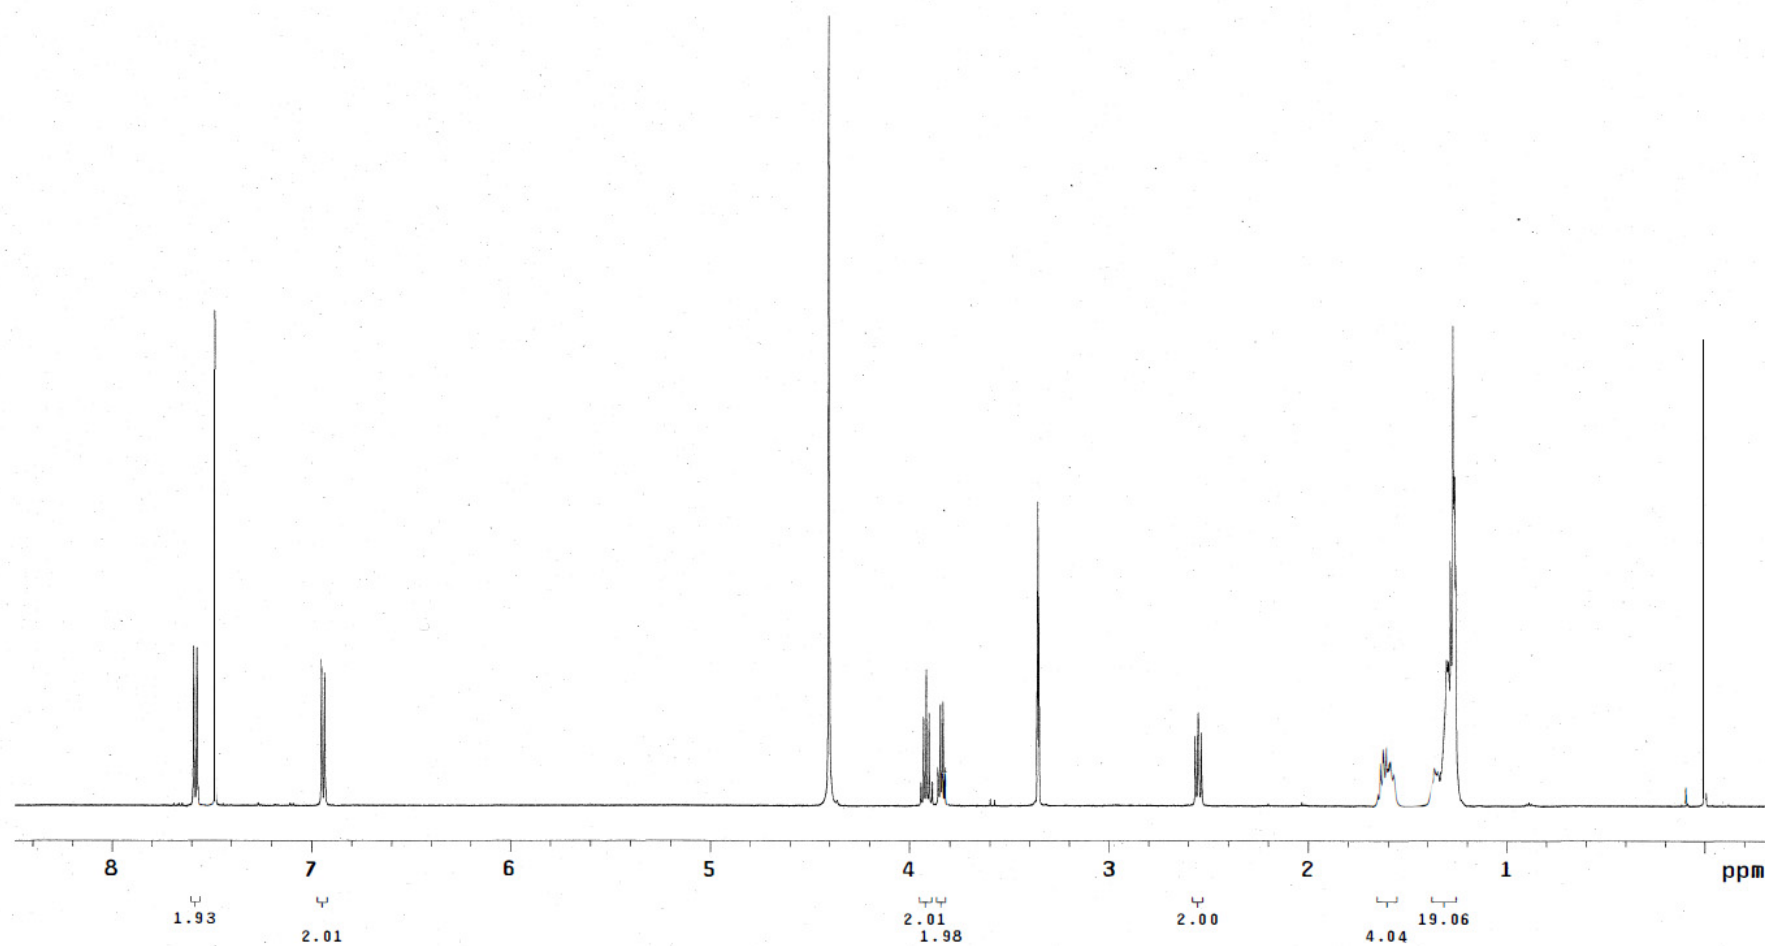

S4

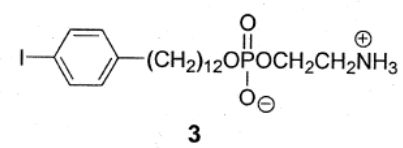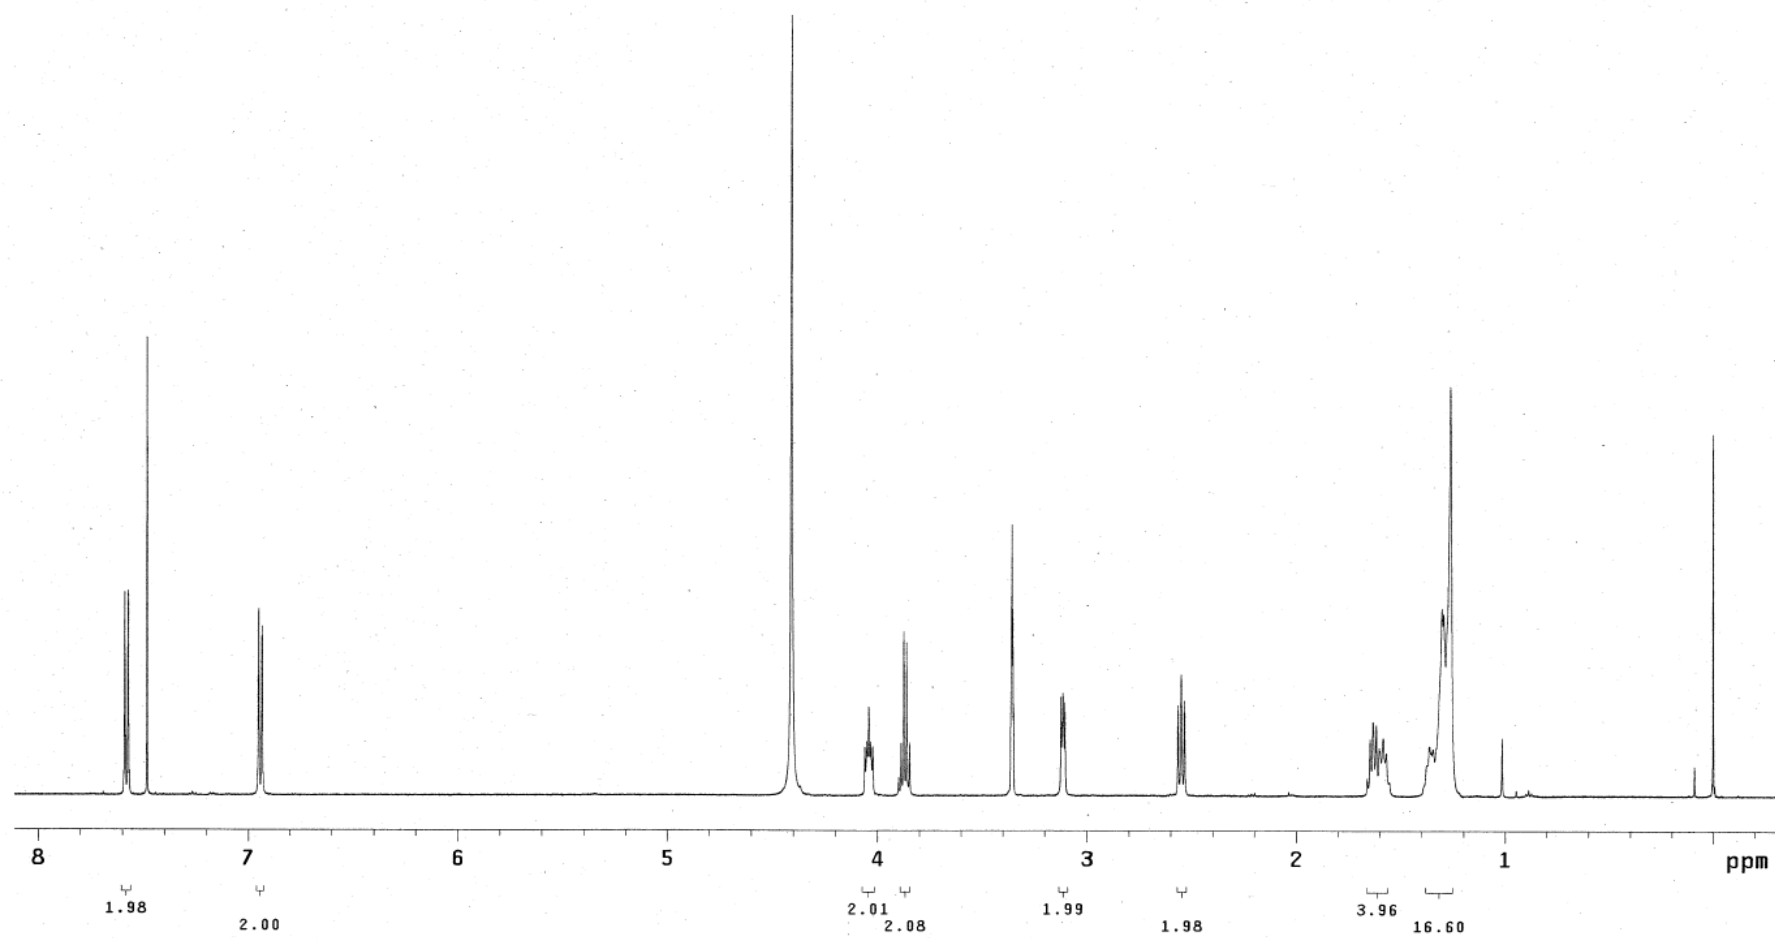

S5

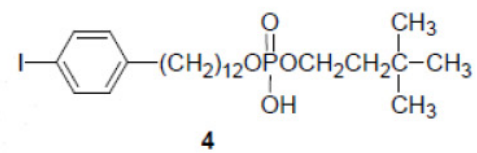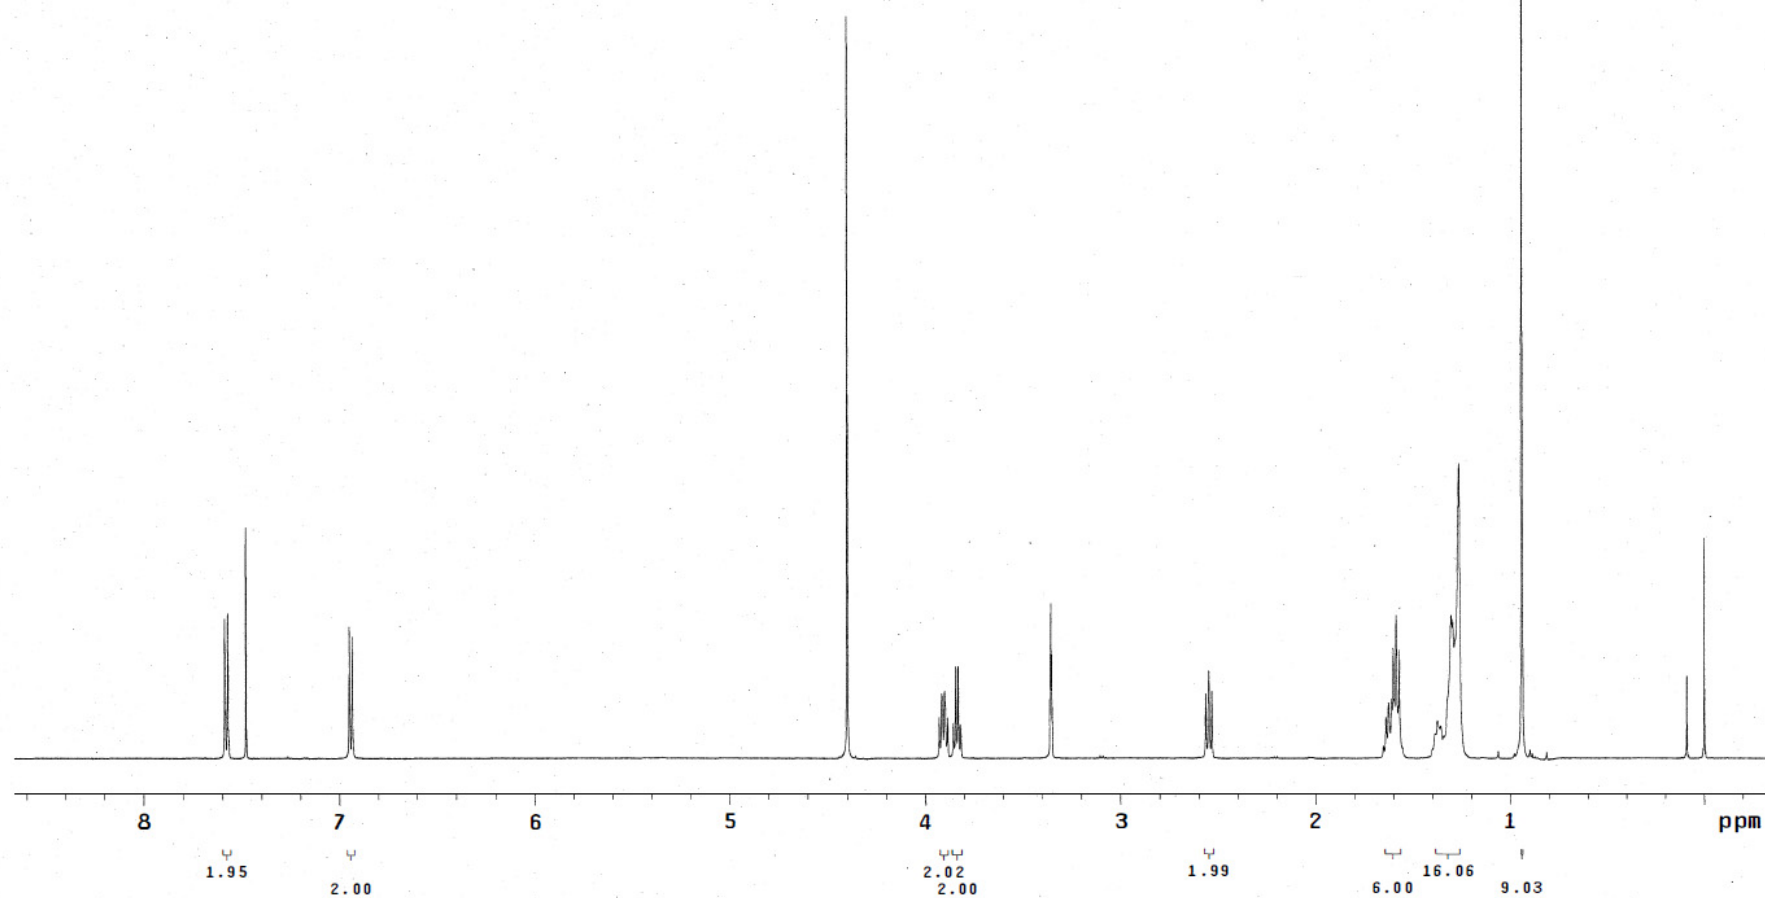

Supplement: s1 [file s1]
